# Supplementary material
Source: publisher figshare collection journal article supplement (https://rs.figshare.com/ndownloader/files/12835286)
Supplement: Supplementary file 1 [file 12835286]

**Supplementary Table 3.** Summary of GFP (transgene) expression and skeletal pattern effects (*Col2a1* expression) in embryo limbs electroporated with the β-catenin-Tcf fusion construct.

| **Specimen** | **1** | **2** | **3** | **4** | **5** | **6** | **7** |
| --- | --- | --- | --- | --- | --- | --- | --- |
| **Level of GFP (transgene) expression; location** | **++** | **+++** | **++** | **++** | **+++**  including elbow joint | **+++**  including elbow and shoulder joint | **+++**  including elbow joint |
| **Effect on skeletal rudiments** | Radius and ulna missing | Interruption within radius | Reduction of radius | Interruption of radius | Reduction of radius and ulna | Reduction of radius and ulna | Ulna missing |
| **Effect on joints** |  |  |  |  | Expansion of elbow joint | Expansion of elbow and shoulder joint | Expansion of elbow joint |
